# Supplementary material
Source: PubMed Central journal article supplement (PMC2438397)
Supplement: 0710867105_Supplemental_PDF.pdf [file 0710867105_Supplemental_PDF.pdf]

# Supporting Information

Sun et al. 10.1073/pnas.0710867105

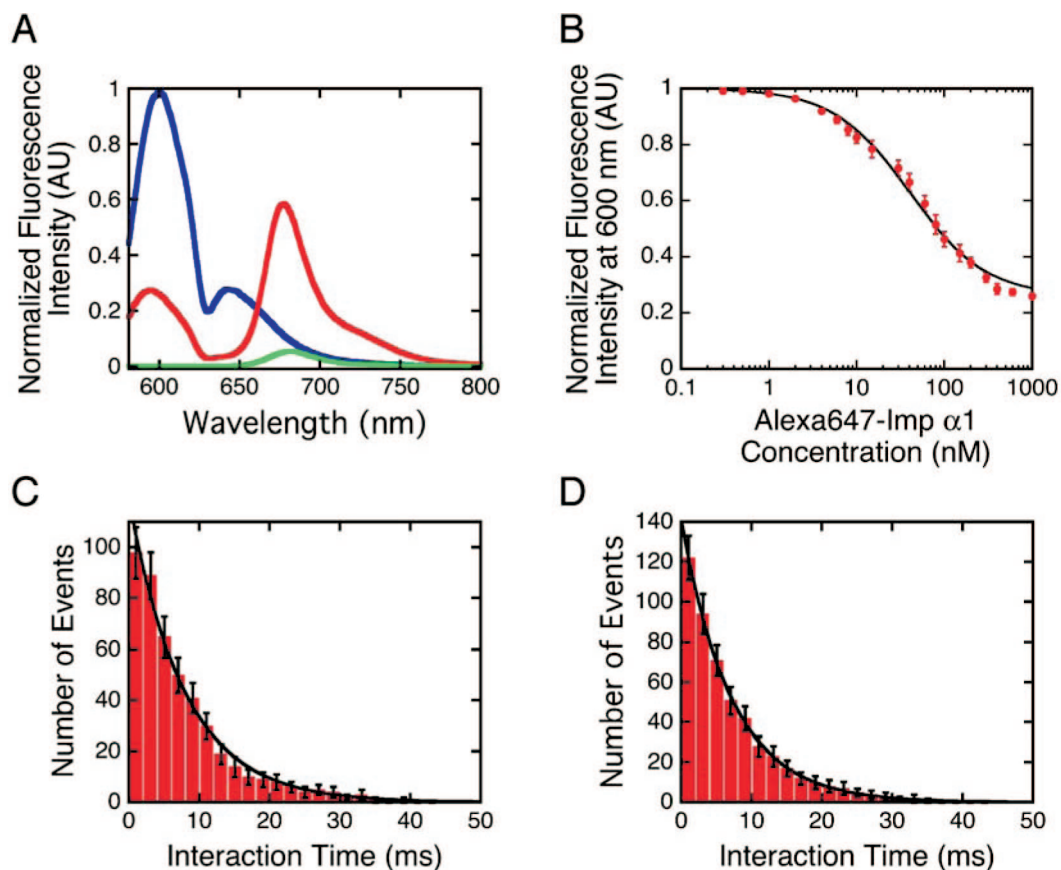

**Fig. S1.** Steady-state FRET and the effect of Imp  $\alpha$ 1 dye labeling on cargo interaction time. (A) FRET between Alexa Fluor 568-NLS-2xGFP(4C) (100 nM) and Alexa Fluor 647-Imp  $\alpha$ 1 (1  $\mu$ M). Blue, NLS-2xGFP(4C) alone; red, NLS-2xGFP(4C) + Imp  $\alpha$ 1; green, Imp  $\alpha$ 1 alone. EX = 568 nm. (B) Donor emission quenching due to FRET ( $K_D = 46 \pm 3$  nM). For comparison, the  $K_D$  is  $\approx 40$  nM in the absence of dyes (1). The data were fit to: normalized fluorescence intensity =  $I_0 + (1 - I_0)(K_D / (K_D + [\text{Imp } \alpha 1]))$ . [Alexa Fluor 568-NLS-2xGFP(4C)] = 100 nM. (C and D) NPC interaction time histograms for Alexa Fluor 647-NLS-2xGFP(4C) in the presence of (C) Alexa Fluor 568-Imp  $\alpha$ 1 ( $7.9 \pm 0.3$  ms;  $n = 459$ ) and (D) Imp  $\alpha$ 1 ( $7.1 \pm 0.1$  ms;  $n = 502$ ). Cargo interaction frequencies (2) for both C and D were  $2.4 \pm 0.3$  events  $s^{-1} \cdot \mu m^{-1}$ . [NLS-2xGFP(4C)] = 0.1 nM; [Imp  $\alpha$ 1] = 250 nM; [Ran] = 2  $\mu$ M; [GTP] = 1 mM; [Imp  $\beta$ 1] = 0.5  $\mu$ M; [NTF2] = 1  $\mu$ M.

1. Catimel B, et al. (2001) Biophysical characterization of interactions involving importin-alpha during nuclear import. *J Biol Chem* 276:34189-34198.

2. Yang W, Musser SM (2006) Nuclear import time and transport efficiency depend on importin  $\beta$  concentration. *J Cell Biol* 174:951-961.

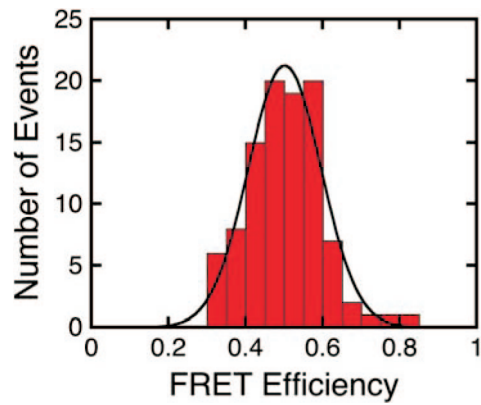

**Fig. S2.** Single molecule FRET efficiency of coverslip-adsorbed Alexa Fluor 568-Imp  $\alpha$ 1/Alexa Fluor 647-NLS-2xGFP(4C) complexes. For convenience, the FRET efficiency,  $E$ , was defined as  $E = I_A / (I_A + I_D)$ , where  $I_D$  and  $I_A$  denote the fluorescence emission intensities observed in the donor and acceptor channels, respectively [Ha T (2001) Single-molecule fluorescence resonance energy transfer. *Methods* 25: 78–86]. These values were corrected for background noise and the donor emission in the acceptor channel (cross-talk). No detectable acceptor emission was observed in the donor channel. As estimated from a Gaussian fit, the FRET efficiency was  $50 \pm 9\%$  ( $n = 100$ ).

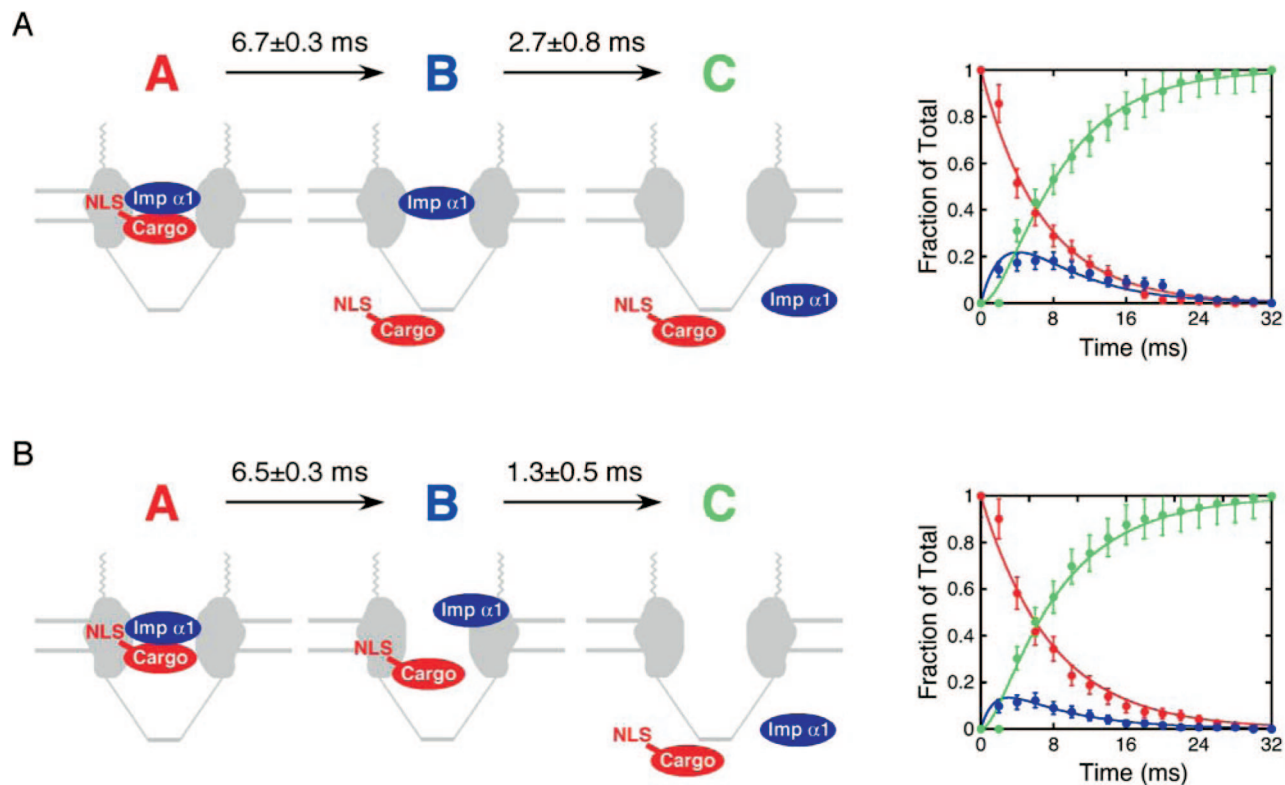

**Fig. S3.** Decomposition of Imp  $\alpha 1$ /cargo complexes (A  $\rightarrow$  B  $\rightarrow$  C). (A) Donor dyes on Imp  $\alpha 1$ . The definition of the three states (A–C) and the global kinetic fit when the donor dyes were on Imp  $\alpha 1$  were described in the main text. The graph is reproduced from Fig. 1D. Global fitting yielded  $\tau_1 = 6.7 \pm 0.3$  ms (A  $\rightarrow$  B) and  $\tau_2 = 2.7 \pm 0.8$  ms (B  $\rightarrow$  C) ( $n = 132$ ). [Alexa Fluor 568–Imp  $\alpha 1$ ] = 0.1 nM; [Alexa Fluor 647–NLS–2xGFP(4C)] = 250 nM. (B) Donor dyes on the cargo. The identical experiment as in A, except that the donor and acceptor dye positions were switched, yielding  $\tau_1 = 6.5 \pm 0.3$  ms and  $\tau_2 = 1.3 \pm 0.5$  ms ( $n = 122$ ). Comparing with A, note that the Imp  $\alpha 1$ /cargo complex dissociation times ( $\tau_1$ ) were identical (within error), as expected. However, the free cargo dissociated from the NPC faster than cargo-free Imp  $\alpha 1$  (compare  $\tau_2$  values). Also note that  $\tau_1 + \tau_2 = 7.8$  ms, consistent with the cargo interaction time reported in Fig. S1C. [Alexa Fluor 568–NLS–2xGFP(4C)] = 0.1 nM; [Alexa Fluor 647–Imp  $\alpha 1$ ] = 250 nM (A and B) The position of the molecule with the acceptor dyes was unknown after Imp  $\alpha 1$ /cargo complex dissociation. Shown is one possible spatial arrangement for the B and C states. The B state could not be identified for  $\approx 14\%$  of the dissociation events in A and  $\approx 21\%$  in B. These data were not included in the analysis, but indicate that the  $\tau_2$  values are upper limits. Red, A; blue, B; green, C. [CAS] = 1.3  $\mu$ M; [Ran] = 2  $\mu$ M; [GTP] = 1 mM; [Imp  $\beta 1$ ] = 0.5  $\mu$ M; [NTF2] = 1  $\mu$ M.

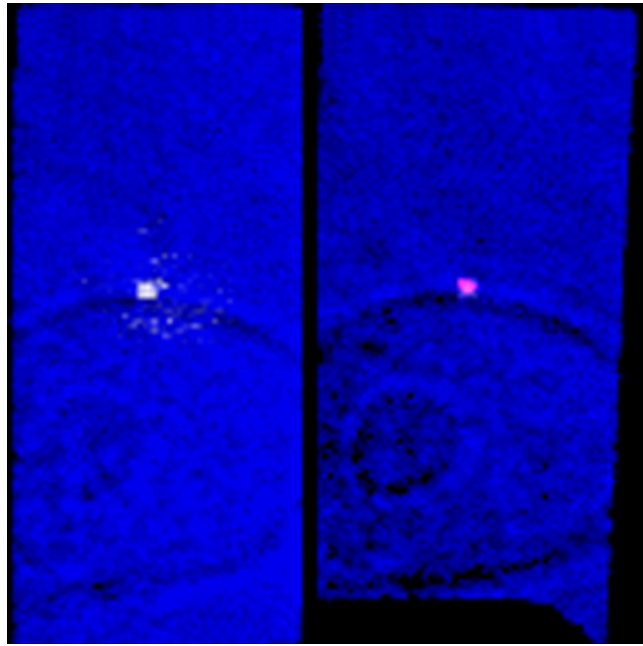

**Movie S1.** Shows the transport event of Fig. 1 A. Pixels are  $240 \text{ nm}^2$ , each frame was acquired in 2 ms, and the playback speed is  $500\times$  slower than real-time. Note: This QuickTime video was made from 16-bit CCD camera data converted to 8-bit. The QuickTime software on late-model Apple computers may destroy the pixelation for video display. If difficulties are encountered in attempts to observe the raw pixelated data, try using the RealPlayer software (Apple) or QuickTime on a PC.

[Movie S1 \(MOV\)](#)

Table S1. Effect of CAS concentration on dissociation and transport efficiencies

| CAS, nM                                                                                         | Result                    | Total, <i>n</i> | Dissociation efficiency, % | Final destination |                   | Transport efficiency, % |
|-------------------------------------------------------------------------------------------------|---------------------------|-----------------|----------------------------|-------------------|-------------------|-------------------------|
|                                                                                                 |                           |                 |                            | Cytoplasm         | Nucleoplasm       |                         |
| <b>+25% Glycerol</b>                                                                            |                           |                 |                            |                   |                   |                         |
| <b>0.1 nM Alexa Fluor 568-Imp <math>\alpha</math>1 and 250 nM Alexa Fluor 647-NLS-2xGFP(4C)</b> |                           |                 |                            |                   |                   |                         |
| 0                                                                                               | Did not dissociate at NPC | 144             | 0                          | 65 (45 $\pm$ 4%)  | 79 (55 $\pm$ 4%)  | 55 $\pm$ 4              |
|                                                                                                 | Did dissociate at NPC     | 0               |                            | 0                 | 0                 |                         |
| 0.01                                                                                            | Did not dissociate at NPC | 82              | 0                          | 43 (52 $\pm$ 6%)  | 39 (48 $\pm$ 6%)  | 48 $\pm$ 6              |
|                                                                                                 | Did dissociate at NPC     | 0               |                            | 0                 | 0                 |                         |
| 0.02                                                                                            | Did not dissociate at NPC | 97              | 1 $\pm$ 1                  | 44 (45 $\pm$ 5%)  | 53 (55 $\pm$ 5%)  | 55 $\pm$ 5              |
|                                                                                                 | Did dissociate at NPC     | 1               |                            | 0                 | 1                 |                         |
| 0.08                                                                                            | Did not dissociate at NPC | 103             | 1 $\pm$ 1                  | 56 (54 $\pm$ 5%)  | 47 (46 $\pm$ 5%)  | 46 $\pm$ 5              |
|                                                                                                 | Did dissociate at NPC     | 1               |                            | 0                 | 1                 |                         |
| 0.2                                                                                             | Did not dissociate at NPC | 87              | 0                          | 45 (52 $\pm$ 5%)  | 42 (48 $\pm$ 5%)  | 48 $\pm$ 5              |
|                                                                                                 | Did dissociate at NPC     | 0               |                            | 0                 | 0                 |                         |
| 0.8                                                                                             | Did not dissociate at NPC | 76              | 1 $\pm$ 1                  | 39 (51 $\pm$ 5%)  | 37 (49 $\pm$ 5%)  | 49 $\pm$ 6              |
|                                                                                                 | Did dissociate at NPC     | 1               |                            | 0                 | 1                 |                         |
| 1.6                                                                                             | Did not dissociate at NPC | 92              | 3 $\pm$ 2                  | 49 (53 $\pm$ 5%)  | 43 (47 $\pm$ 5%)  | 46 $\pm$ 5              |
|                                                                                                 | Did dissociate at NPC     | 3               |                            | 3                 | 1                 |                         |
| 3.2                                                                                             | Did not dissociate at NPC | 82              | 8 $\pm$ 3                  | 47 (57 $\pm$ 5%)  | 35 (43 $\pm$ 5%)  | 44 $\pm$ 5              |
|                                                                                                 | Did dissociate at NPC     | 7               |                            | 2                 | 5                 |                         |
| 8.0                                                                                             | Did not dissociate at NPC | 65              | 16 $\pm$ 4                 | 41 (63 $\pm$ 6%)  | 24 (37 $\pm$ 6%)  | 55 $\pm$ 6              |
|                                                                                                 | Did dissociate at NPC     | 12              |                            | 1                 | 11                |                         |
| 16                                                                                              | Did not dissociate at NPC | 57              | 28 $\pm$ 5                 | 31 (54 $\pm$ 6%)  | 26 (46 $\pm$ 6%)  | 54 $\pm$ 6              |
|                                                                                                 | Did dissociate at NPC     | 22              |                            | 5                 | 17                |                         |
| 32                                                                                              | Did not dissociate at NPC | 53              | 38 $\pm$ 5                 | 38 (72 $\pm$ 6%)  | 15 (28 $\pm$ 6%)  | 48 $\pm$ 5              |
|                                                                                                 | Did dissociate at NPC     | 32              |                            | 6                 | 26                |                         |
| 65                                                                                              | Did not dissociate at NPC | 65              | 51 $\pm$ 4                 | 54 (83 $\pm$ 5%)  | 11 (17 $\pm$ 5%)  | 52 $\pm$ 4              |
|                                                                                                 | Did dissociate at NPC     | 67              |                            | 9 (13 $\pm$ 4%)   | 58 (87 $\pm$ 4%)  |                         |
| 100                                                                                             | Did not dissociate at NPC | 58              | 47 $\pm$ 5                 | 48 (83 $\pm$ 5%)  | 10 (17 $\pm$ 5%)  | 46 $\pm$ 5              |
|                                                                                                 | Did dissociate at NPC     | 52              |                            | 11 (21 $\pm$ 6%)  | 41 (79 $\pm$ 6%)  |                         |
| 130                                                                                             | Did not dissociate at NPC | 73              | 53 $\pm$ 4                 | 65 (89 $\pm$ 4%)  | 8 (11 $\pm$ 4%)   | 47 $\pm$ 4              |
|                                                                                                 | Did dissociate at NPC     | 81              |                            | 16 (20 $\pm$ 5%)  | 65 (80 $\pm$ 4%)  |                         |
| 160                                                                                             | Did not dissociate at NPC | 43              | 43 $\pm$ 6                 | 30 (70 $\pm$ 7%)  | 13 (30 $\pm$ 7%)  | 51 $\pm$ 6              |
|                                                                                                 | Did dissociate at NPC     | 33              |                            | 4 (12 $\pm$ 6%)   | 29 (88 $\pm$ 6%)  |                         |
| 320                                                                                             | Did not dissociate at NPC | 72              | 48 $\pm$ 4                 | 65 (90 $\pm$ 4%)  | 7 (10 $\pm$ 4%)   | 47 $\pm$ 4              |
|                                                                                                 | Did dissociate at NPC     | 66              |                            | 8 (12 $\pm$ 4%)   | 58 (88 $\pm$ 4%)  |                         |
| 1300                                                                                            | Did not dissociate at NPC | 230             | 55 $\pm$ 2                 | 189 (82 $\pm$ 2%) | 41 (18 $\pm$ 2%)  | 53 $\pm$ 2              |
|                                                                                                 | Did dissociate at NPC     | 280             |                            | 53 (19 $\pm$ 2%)  | 227 (81 $\pm$ 2%) |                         |
| <b>+25% Glycerol</b>                                                                            |                           |                 |                            |                   |                   |                         |
| <b>0.1 nM Alexa Fluor 568-NLS-2xGFP(4C) and 250 nM Alexa Fluor 647-Imp <math>\alpha</math>1</b> |                           |                 |                            |                   |                   |                         |
| 0                                                                                               | Did not dissociate at NPC | 128             | 0                          | 59 (46 $\pm$ 4%)  | 69 (54 $\pm$ 4%)  | 54 $\pm$ 4              |
|                                                                                                 | Did dissociate at NPC     | 0               |                            | 0                 | 0                 |                         |
| 5                                                                                               | Did not dissociate at NPC | 177             | 8 $\pm$ 2                  | 101 (57 $\pm$ 5%) | 76 (43 $\pm$ 5%)  | 45 $\pm$ 4              |
|                                                                                                 | Did dissociate at NPC     | 16              |                            | 5 (31 $\pm$ 11%)  | 11 (69 $\pm$ 11%) |                         |
| 20                                                                                              | Did not dissociate at NPC | 189             | 35 $\pm$ 3                 | 134 (71 $\pm$ 3%) | 55 (29 $\pm$ 3%)  | 46 $\pm$ 4              |
|                                                                                                 | Did dissociate at NPC     | 102             |                            | 24 (24 $\pm$ 4%)  | 78 (76 $\pm$ 4%)  |                         |
| 80                                                                                              | Did not dissociate at NPC | 112             | 51 $\pm$ 3                 | 91 (81 $\pm$ 4%)  | 21 (19 $\pm$ 4%)  | 49 $\pm$ 3              |
|                                                                                                 | Did dissociate at NPC     | 117             |                            | 25 (21 $\pm$ 4%)  | 92 (79 $\pm$ 4%)  |                         |
| 150                                                                                             | Did not dissociate at NPC | 123             | 59 $\pm$ 3                 | 96 (78 $\pm$ 4%)  | 27 (22 $\pm$ 4%)  | 51 $\pm$ 3              |
|                                                                                                 | Did dissociate at NPC     | 178             |                            | 52 (29 $\pm$ 3%)  | 126 (71 $\pm$ 3%) |                         |
| 1300                                                                                            | Did not dissociate at NPC | 215             | 61 $\pm$ 2                 | 178 (83 $\pm$ 3%) | 37 (17 $\pm$ 3%)  | 52 $\pm$ 2              |
|                                                                                                 | Did dissociate at NPC     | 342             |                            | 87 (25 $\pm$ 2%)  | 255 (75 $\pm$ 2%) |                         |
| <b>-Glycerol</b>                                                                                |                           |                 |                            |                   |                   |                         |
| <b>0.1 nM Alexa Fluor 568-Imp <math>\alpha</math>1 and 250 nM Alexa Fluor 647-NLS-2xGFP(4C)</b> |                           |                 |                            |                   |                   |                         |
| 0.1                                                                                             | Did not dissociate at NPC | 53              | 4 $\pm$ 3                  | 31 (58 $\pm$ 7%)  | 22 (42 $\pm$ 5%)  | 44 $\pm$ 7              |
|                                                                                                 | Did dissociate at NPC     | 2               |                            | 0                 | 2                 |                         |
| 1                                                                                               | Did not dissociate at NPC | 62              | 5 $\pm$ 3                  | 35 (54 $\pm$ 6%)  | 27 (46 $\pm$ 6%)  | 46 $\pm$ 6              |
|                                                                                                 | Did dissociate at NPC     | 3               |                            | 0                 | 3                 |                         |
| 10                                                                                              | Did not dissociate at NPC | 71              | 13 $\pm$ 4                 | 38 (54 $\pm$ 5%)  | 33 (46 $\pm$ 5%)  | 52 $\pm$ 6              |
|                                                                                                 | Did dissociate at NPC     | 11              |                            | 1                 | 10                |                         |
| 50                                                                                              | Did not dissociate at NPC | 57              | 44 $\pm$ 5                 | 40 (70 $\pm$ 6%)  | 17 (30 $\pm$ 6%)  | 49 $\pm$ 5              |
|                                                                                                 | Did dissociate at NPC     | 44              |                            | 12 (27 $\pm$ 7%)  | 32 (73 $\pm$ 7%)  |                         |
| 100                                                                                             | Did not dissociate at NPC | 56              | 53 $\pm$ 5                 | 51 (91 $\pm$ 4%)  | 5 (8 $\pm$ 4%)    | 50 $\pm$ 5              |
|                                                                                                 | Did dissociate at NPC     | 63              |                            | 9 (14 $\pm$ 4%)   | 54 (86 $\pm$ 4%)  |                         |
| 500                                                                                             | Did not dissociate at NPC | 43              | 56 $\pm$ 5                 | 32 (74 $\pm$ 7%)  | 11 (26 $\pm$ 7%)  | 53 $\pm$ 5              |
|                                                                                                 | Did dissociate at NPC     | 55              |                            | 14 (25 $\pm$ 6%)  | 41 (75 $\pm$ 6%)  |                         |

[Ran] = 2  $\mu$ M; [GTP] = 1 mM; [Imp  $\beta$ 1] = 0.5  $\mu$ M; [NTF2] = 1  $\mu$ M.

**Table S2. Dissociation of Imp  $\alpha$ 1/cargo complexes in the absence of RanGTP and CAS**

| Destination | <i>n</i> | Interaction time, ms | Transport efficiency* | Number dissociated | Dissociation efficiency* |
|-------------|----------|----------------------|-----------------------|--------------------|--------------------------|
| Nucleoplasm | 87       | 27 $\pm$ 4           | 45 $\pm$ 4%           | 0                  | 0%                       |
| Cytoplasm   | 107      | 28 $\pm$ 3           |                       | 0                  |                          |

[Alexa Fluor 568–NLS–2xGFP(4C)] = 0.1 nM; [Alexa Fluor 647–Imp  $\alpha$ 1] = 250 nM; [Imp  $\beta$ ] = 0.5  $\mu$ M; [NTF2] = 1  $\mu$ M.

\*Transport and dissociation efficiencies were calculated from the data in the nucleoplasm and cytoplasm rows.
